# Supplementary material
Source: PubMed Central journal article supplement (PMC4310455)
Supplement: NIHMS656394-supplement-Supplementary_data.pdf [file NIHMS656394-supplement-Supplementary_data.pdf]

Appendix 1a. Prediction of severe AKI by biomarker composites

| Marker            | Sensitivity | Specificity | PPV        | NPV        | + LR            | - LR          |
|-------------------|-------------|-------------|------------|------------|-----------------|---------------|
| $\Delta$ SCr +    | 22 (13-35)  | 94 (91-96)  | 45 (27-64) | 85 (80-89) | 3.8 (1.9-7.2)   | 0.8 (0.7-0.9) |
| uNGAL-<br>pCysC - | 3 (0-11)    | 46 (40-52)  | 1 (0-5)    | 69 (61-75) | 0.1 (0-0.2)     | 2.1 (1.8-2.4) |
| uNGAL-<br>pCysC + | 8 (3-18)    | 59 (53-65)  | 4 (1-9)    | 75 (68-80) | 0.2 (0.1-0.5)   | 1.6 (1.4-1.8) |
| uNGAL+<br>pCysC - | 26 (15-39)  | 99 (96-100) | 18 (14-22) | 86 (82-89) | 18.3 (6.3-52.7) | 0.8 (0.7-0.9) |
| uNGAL+<br>pCysC + | 63 (50-75)  | 96 (93-98)  | 78 (64-88) | 92 (89-95) | 16.2 (8.8-29.8) | 0.4 (0.3-0.5) |

Appendix 1b. Prediction of AKI duration by biomarker composites

| Marker            | Sensitivity | Specificity | PPV        | NPV        | + LR           | - LR          |
|-------------------|-------------|-------------|------------|------------|----------------|---------------|
| $\Delta$ SCr +    | 31 (15-51)  | 93 (90-96)  | 29 (14-48) | 93 (90-96) | 4.5 (2.3-8.8)  | 0.7 (0.6-0.9) |
| uNGAL-<br>pCysC - | 4 (0-18)    | 52 (46-57)  | 1 (0-4)    | 85 (80-90) | 0.1 (0-0.5)    | 1.9 (1.7-2.1) |
| uNGAL-<br>pCysC + | 0 (0-12)    | 62 (56-67)  | 0 (0-3)    | 87 (82-91) | 0              | 1.6 (1.5-1.8) |
| uNGAL+<br>pCysC - | 28 (13-47)  | 96 (93-98)  | 40 (19-64) | 94 (90-96) | 7.3 (3.2-16.3) | 0.8 (0.6-0.9) |
| uNGAL+<br>pCysC + | 69 (49-85)  | 91 (87-94)  | 40 (26-55) | 97 (94-99) | 7.3 (4.8-11.0) | 0.3 (0.2-0.6) |

Biomarker composites of urinary neutrophil gelatinase associated lipocalin (uNGAL) measured at 6 hours and plasma Cystatin C (pCysC) measured at 2 hours in relation to their respective cut-off values for positivity  $\geq 200$  ng and 0.8 mg/L (+) demonstrate improved prediction of severe acute kidney injury (AKI) characteristics compared to the change in serum creatinine ( $\Delta$  SCr) from pre-operative to first post-operative value (cut-off value for positivity of  $\geq 50\%$  increase). uNGAL is normalized to urinary creatinine. PPV = positive predictive value, NPV = negative predictive value, LR = likelihood ratio. Sensitivity, specificity, PPV, and NPV are depicted as percentages. All values are listed with 95% confidence intervals.

Appendix 2a. Prediction of severe AKI by biomarker composites including non-normalized uNGAL

| Marker            | Sensitivity | Specificity | PPV        | NPV        | + LR            | - LR          |
|-------------------|-------------|-------------|------------|------------|-----------------|---------------|
| $\Delta$ SCr +    | 22 (13-35)  | 94 (91-96)  | 45 (27-64) | 85 (80-89) | 3.8 (1.9-7.2)   | 0.8 (0.7-0.9) |
| uNGAL-<br>pCysC - | 3 (0.5-11)  | 48 (42-54)  | 1 (0-5)    | 69 (62-76) | 0.1 (0.0-0.2)   | 2.0 (1.8-2.3) |
| uNGAL-<br>pCysC + | 13 (6-24)   | 59 (53-65)  | 6 (3-12)   | 75 (69-81) | 0.3 (0.2-0.6)   | 1.5 (1.3-1.7) |
| uNGAL+<br>pCysC - | 26 (15-39)  | 97 (94-99)  | 64 (42-82) | 86 (81-89) | 8.1 (3.8-17.5)  | 0.8 (0.7-0.9) |
| uNGAL+<br>pCysC + | 58 (45-70)  | 97 (94-98)  | 78 (63-89) | 91 (88-94) | 16.4 (8.6-31.3) | 0.4 (0.3-0.6) |

Appendix 2b. Prediction of AKI &gt; 2 days by biomarker composites including non-normalized uNGAL

| Marker            | Sensitivity | Specificity | PPV        | NPV        | + LR           | - LR          |
|-------------------|-------------|-------------|------------|------------|----------------|---------------|
| $\Delta$ SCr +    | 31 (15-51)  | 93 (90-96)  | 29 (14-48) | 93 (90-96) | 4.5 (2.3-8.8)  | 0.7 (0.6-0.9) |
| uNGAL-<br>pCysC - | 0 (0-12)    | 53 (47-58)  | 0 (0-2)    | 85 (79-90) | 0              | 1.9 (1.7-2.1) |
| uNGAL-<br>pCysC + | 0 (0-12)    | 60 (55-66)  | 0 (0-3)    | 87 (82-91) | 0              | 1.7 (1.5-1.8) |
| uNGAL+<br>pCysC - | 31 (15-51)  | 95 (92-97)  | 36 (18-57) | 94 (91-96) | 6.1 (2.9-12.6) | 0.7 (0.6-0.9) |
| uNGAL+<br>pCysC + | 69 (49-85)  | 92 (88-95)  | 43 (29-59) | 97 (94-99) | 8.4 (5.4-13.0) | 0.3 (0.2-0.6) |

Biomarker composites of urinary neutrophil gelatinase associated lipocalin (uNGAL) and plasma Cystatin C (pCysC) in relation to their respective cut-off values for positivity  $\geq 100$  ng and 0.8 mg/L (+) demonstrate significantly improved prediction of acute kidney injury (AKI) severity (A) and duration > 2 days (b) compared to the change in serum creatinine ( $\Delta$  SCr) from pre-operative to first post-operative value (cut-off value for positivity of  $\geq 50\%$  increase). uNGAL is not normalized to urine creatinine. PPV = positive predictive value, NPV = negative predictive value, LR = likelihood ratio. Sensitivity, specificity, PPV, and NPV are depicted as percentages. All values are listed with 95% confidence intervals.

Appendix 3a. Prediction of severe AKI by biomarker composites using pCysC

| Marker            | Sensitivity | Specificity | PPV        | NPV        | + LR          | - LR          |
|-------------------|-------------|-------------|------------|------------|---------------|---------------|
| $\Delta$ SCr +    | 22 (13-35)  | 94 (91-96)  | 45 (27-64) | 85 (80-89) | 3.8 (1.9-7.2) | 0.8 (0.7-0.9) |
| uNGAL-<br>pCysC - | 5 (1-14)    | 46 (41-52)  | 2 (0-6)    | 69 (62-76) | 0.1 (0-0.3)   | 2.0 (1.8-2.3) |
| uNGAL-<br>pCysC + | 23 (13-35)  | 57 (50-63)  | 10 (6-17)  | 77 (71-82) | 0.5 (0.3-0.8) | 1.4 (1.2-1.6) |
| uNGAL+<br>pCysC - | 24 (14-37)  | 98 (96-99)  | 75 (51-91) | 75 (51-91) | 13.7 (5-36)   | 0.8 (0.7-0.9) |
| uNGAL+<br>pCysC + | 48 (36-61)  | 99 (96-100) | 88 (73-97) | 90 (86-93) | 34.2 (13-94)  | 0.5 (0.4-0.7) |

Appendix 3b. Prediction of severe AKI by biomarker composites using  $\Delta$  SCr

| Marker                   | Sensitivity | Specificity | PPV        | NPV        | + LR             | - LR            |
|--------------------------|-------------|-------------|------------|------------|------------------|-----------------|
| $\Delta$ SCr +           | 22 (13-35)  | 94 (91-96)  | 45 (27-64) | 85 (80-89) | 3.8 (1.9-7.2)    | 0.8 (0.7-0.9)   |
| uNGAL-<br>$\Delta$ SCr - | 19 (10-31)  | 8 (5-12)    | 4 (2-8)    | 31 (20-43) | 0.2 (0.1-0.4)    | 10.4 (6.8-15.8) |
| uNGAL-<br>$\Delta$ SCr + | 8 (3-18)    | 95 (93-98)  | 28 (10-53) | 83 (78-87) | 1.8 (0.7-4.7)    | 1.0 (0.9-1.0)   |
| uNGAL+<br>$\Delta$ SCr - | 47 (34-60)  | 98 (96-99)  | 85 (69-95) | 89 (85-93) | 26.5 (10.7-65.7) | 0.5 (0.4-0.7)   |
| uNGAL+<br>$\Delta$ SCr + | 26 (15-39)  | 99 (96-100) | 80 (56-94) | 86 (82-89) | 18.3 (6.3-53)    | 0.8 (0.7-0.9)   |

Appendix 3c. Prediction of AKI > 2 days by biomarker composites using pCysC

| Marker            | Sensitivity | Specificity | PPV           | NPV        | + LR            | - LR          |
|-------------------|-------------|-------------|---------------|------------|-----------------|---------------|
| $\Delta$ SCr +    | 31 (15-51)  | 93 (90-96)  | 29 (14-48)    | 93 (90-96) | 4.5 (2.3-8.8)   | 0.7 (0.6-0.9) |
| uNGAL-<br>pCysC - | 7 (1-23)    | 52 (46-58)  | 1.3 (0.2-4.6) | 86 (80-90) | 0.1 (0-0.6)     | 1.8 (1.5-2.0) |
| uNGAL-<br>pCysC + | 0 (0-16)    | 57 (51-62)  | 0 (0-3)       | 89 (83-93) | 0 (nc)          | 1.8 (1.6-1.9) |
| uNGAL+<br>pCysC - | 24 (10-44)  | 96 (93-98)  | 35 (15-59)    | 93 (90-96) | 5.9 (2.5-13.5)  | 0.8 (0.6-1.0) |
| uNGAL+<br>pCysC + | 69 (49-85)  | 96 (93-98)  | 59 (41-75)    | 97 (95-99) | 15.6 (8.8-27.5) | 0.3 (0.2-0.6) |

Appendix 3d. Prediction of AKI > 2 days by biomarker composites using  $\Delta$  SCr

| Marker                   | Sensitivity | Specificity | PPV        | NPV        | + LR            | - LR          |
|--------------------------|-------------|-------------|------------|------------|-----------------|---------------|
| $\Delta$ SCr +           | 31 (15-51)  | 93 (90-96)  | 29 (14-48) | 93 (90-96) | 4.5 (2.3-8.8)   | 0.7 (0.6-0.9) |
| uNGAL-<br>$\Delta$ SCr - | 3 (0-18)    | 14 (10-18)  | 0 (0-2)    | 61 (49-73) | 0 (0-0.3)       | 6.9 (5.2-9.2) |
| uNGAL-<br>$\Delta$ SCr + | 3 (0-18)    | 95 (92-97)  | 6 (1-27)   | 91 (88-94) | 0.6 (0.1-4.7)   | 1.0 (0.9-1.1) |
| uNGAL+<br>$\Delta$ SCr - | 59 (39-76)  | 95 (92-97)  | 50 (32-68) | 96 (94-98) | 10.9 (6.3-18.9) | 0.4 (0.3-0.7) |
| uNGAL+<br>$\Delta$ SCr + | 35 (18-54)  | 97 (94-98)  | 50 (27-73) | 94 (91-96) | 10.9 (4.9-24.0) | 0.7 (0.5-0.9) |

Biomarker composites of urinary neutrophil gelatinase associated lipocalin (uNGAL) and plasma Cystatin C (pCysC) measured in relation to their respective cut-off values for positivity  $\geq 200$  ng and 0.8 mg/L (+) (3a and 3c) vs. uNGAL combined with  $\Delta$  SCr (3b and 3d) (change in serum creatinine from pre-operative to first post-operative value (cut-off value for positivity of  $\geq 50\%$  increase) for prediction of severe acute kidney injury (AKI) (3a/3b) and AKI > 2 days (3c/3d). uNGAL is normalized to urinary creatinine. PPV = positive predictive value, NPV = negative predictive value, LR = likelihood ratio. Sensitivity, specificity, PPV, and NPV are depicted as percentages. All values are listed with 95% confidence intervals.
